# Supplementary material for: Genome-wide CNV analysis reveals variants associated with growth traits in Bos indicus
Source: PubMed Central journal article supplement (PMC4888316; doi:10.1186/s12864-016-2461-4), 2016-06-01

\*\*.:\*.\*\*\*\*\*:\*\*\*\*\*:\*\*\*\*\*.\*\*\*\*\*.:\*\*\*\*\*:  
 Cattle MTASGHTNPYSIVSSEEDGLRLVTMSGANGFGNGKVHTRRRRCRNRVFKKNGQCNI EFANMDEKSQRYLADMF TTCVDIRWRYMLLIFSLAFLASWLLFGVIFWVIAVAHGDLPEAEHGRTPCVLQV  
 Human MTAASRANPYSIVSSEEDGLHLVTMSGANGFGNGKVHTRRRRCRNRVFKKNGQCNI EFANMDEKSQRYLADMF TTCVDIRWRYMLLIFSLAFLASWLLFGIIFWVIAVAHGDLPEAEGRGRTPCVMQV  
 Mouse MTAASRANPYSIVSSEEDGLHLVTMSGANGFGNGKVHTRRRRCRNRVFKKNGQCNI EFANMDEKSQRYLADMF TTCVDIRWRYMLLIFSLAFLASWLLFGIIFWVIAVAHGDLPEAEGRGRTPCVLQV  
 Rat MTAASRANPYSIVSSEEDGLHLVTMSGANGFGNGKVHTRRRRCRNRVFKKNGQCNI EFANMDEKSQRYLADMF TTCVDIRWRYMLLIFSLAFLASWLLFGIIFWVIAVAHGDLPEAEGRGRTPCVLQV  
 Monkey MTAASRANPYSIVSSEEDGLHLVTMSGANGFGNGKVHTRRRRCRNRVFKKNGQCNI EFANMDEKSQRYLADMF TTCVDIRWRYMLLIFSLAFLASWLLFGVIFWVIAVVGDLPEAEGRGRTPCVMQV  
 Pig MTAASRANPYSIVSSEEDGLHLVTMSGANGFGNGKVHTRRRRCRNRVFKKNGQCNI EFANMDEKSQRYLADMF TTCVDIRWRYMLLIFSLAFLASWLLFGVIFWVIAVAHGDLPEAENGRTPCVMQV  
 Dog MTSAGRANPYSIVSSEEDGLHLVTMSGANGFGNGKVHTRRRRCRNRVFKKNGQCNI EFANMDEKSQRYLADMF TTCVDIRWRYMLLIFSLAFLASWLLFGIIFWVIAVAHGDLPEAEGRGRTPCVMQV

\*\*\*\*\*:  
 Cattle HGFMAAFLFSIETQTTIYGGLRCVTEECPVAVFMVVAQSIVGCIIDSFMIGAIMAKMARPKKRAQTLLFSHNAVVALRDGKLCIMWRVGNLRRKSHIVEAHVRAQLIKPRVTEEGEYIPLDQIDIDVIG  
 Human HGFMAAFLFSIETQTTIYGGLRCVTEECPVAVFMVVAQSIVGCIIDSFMIGAIMAKMARPKKRAQTLLFSHNAVVALRDGKLCIMWRVGNLRRKSHIVEAHVRAQLIKPRVTEEGEYIPLDQIDIDVIG  
 Mouse HGFMAAFLFSIETQTTIYGGLRCVTEECPVAVFMVVAQSIVGCIIDSFMIGAIMAKMARPKKRAQTLLFSHNAVVALRDGKLCIMWRVGNLRRKSHIVEAHVRAQLIKPRVTEEGEYIPLDQIDIDVIG  
 Rat HGFMAAFLFSIETQTTIYGGLRCVTEECPVAVFMVVAQSIVGCIIDSFMIGAIMAKMARPKKRAQTLLFSHNAVVALRDGKLCIMWRVGNLRRKSHIVEAHVRAQLIKPRVTEEGEYIPLDQIDIDVIG  
 Monkey HGFMAAFLFSIETQTTIYGGLRCVTEECPVAVFMVVAQSIVGCIIDSFMIGAIMAKMARPKKRAQTLLFSHNAVVALRDGKLCIMWRVGNLRRKSHIVEAHVRAQLIKPRVTEEGEYIPLDQIDIDVIG  
 Pig HGFMAAFLFSIETQTTIYGGLRCVTEECPVAVFMVVAQSIVGCIIDSFMIGAIMAKMARPKKRAQTLLFSHNAVVALRDGKLCIMWRVGNLRRKSHIVEAHVRAQLIKPRVTEEGEYIPLDQIDIDVIG  
 Dog HGFMAAFLFSIETQTTIYGGLRCVTEECPVAVFMVVAQSIVGCIIDSFMIGAIMAKMARPKKRAQTLLFSHNAVVALRDGKLCIMWRVGNLRRKSHIVEAHVRAQLIKPRVTEEGEYIPLDQIDIDVIG

\*\*\*\*\*:  
 Cattle FDKGLDRIFLVSPITILHEIDEASPLFGISRQDLETDDFEIVVILEGMVEATAMTQARSSYLANEILWGHRRFEPVLFEEKNQYKIDYSHFHKTIEVPSTPRCSARDLVENKFFLPSANSFCYENEL  
 Human FDKGLDRIFLVSPITILHEIDEASPLFGISRQDLETDDFEIVVILEGMVEATAMTQARSSYLANEILWGHRRFEPVLFEEKNQYKIDYSHFHKTIEVPSTPRCSARDLVENKFFLPSANSFCYENEL  
 Mouse FDKGLDRIFLVSPITILHEIDEASPLFGISRQDLETDDFEIVVILEGMVEATAMTQARSSYLANEILWGHRRFEPVLFEEKNQYKIDYSHFHKTIEVPSTPRCSARDLVENKFFLPSANSFCYENEL  
 Rat FDKGLDRIFLVSPITILHEIDEASPLFGISRQDLETDDFEIVVILEGMVEATAMTQARSSYLANEILWGHRRFEPVLFEEKNQYKIDYSHFHKTIEVPSTPRCSARDLVENKFFLPSANSFCYENEL  
 Monkey FDKGLDRIFLVSPITILHEIDEASPLFGISRQDLETDDFEIVVILEGMVEATAMTQARSSYLANEILWGHRRFEPVLFEEKNQYKIDYSHFHKTIEVPSTPRCSARDLVENKFFLPSANSFCYENEL  
 Pig FDKGLDRIFLVSPITILHEIDEASPLFGISRQDLETDDFEIVVILEGMVEATAMTQARSSYLANEILWGHRRFEPVLFEEKNQYKIDYSHFHKTIEVPSTPRCSARDLVENKFFLPSANSFCYENEL  
 Dog FDKGLDRIFLVSPITILHEIDEASPLFGISRQDLETDDFEIVVILEGMVEATAMTQARSSYLANEILWGHRRFEPVLFEEKNQYKIDYSHFHKTIEVPSTPRCSARDLVENKFFLPSANSFCYENEL

\*\*\*\*\*.:\*.:\*:  
 Cattle AFLSRDEEDEVGDDSLGPPQARRDFDRPQAGTALEQRPYRRESEI  
 Human AFLSRDEEADGDGGRSRDGLSPQARHDFDRLQAGGGVLEQRPYRRESEI  
 Mouse AFLSRDEEDEVATDRDGRSPQPEHDFDRLQASSAALERPYRRESEI  
 Rat AFLSRDEEDEVATDRDGRSPQPEHDFDRLQASSGALERPYRRESEI  
 Monkey AFLSRDEEADGDGGRSRDGLSPQARHDFDRLQAGSGALEQRPYRRESEI  
 Pig AFLSRDEEDEVGDDGCSRDLSPQARHDFDRLQAGGALEQRPYRRESEI  
 Dog AFLSRDEEADGDGGRSPQARHDFDRPQASGGGSGGGGGGGVGLVLEQRPYRRESEI

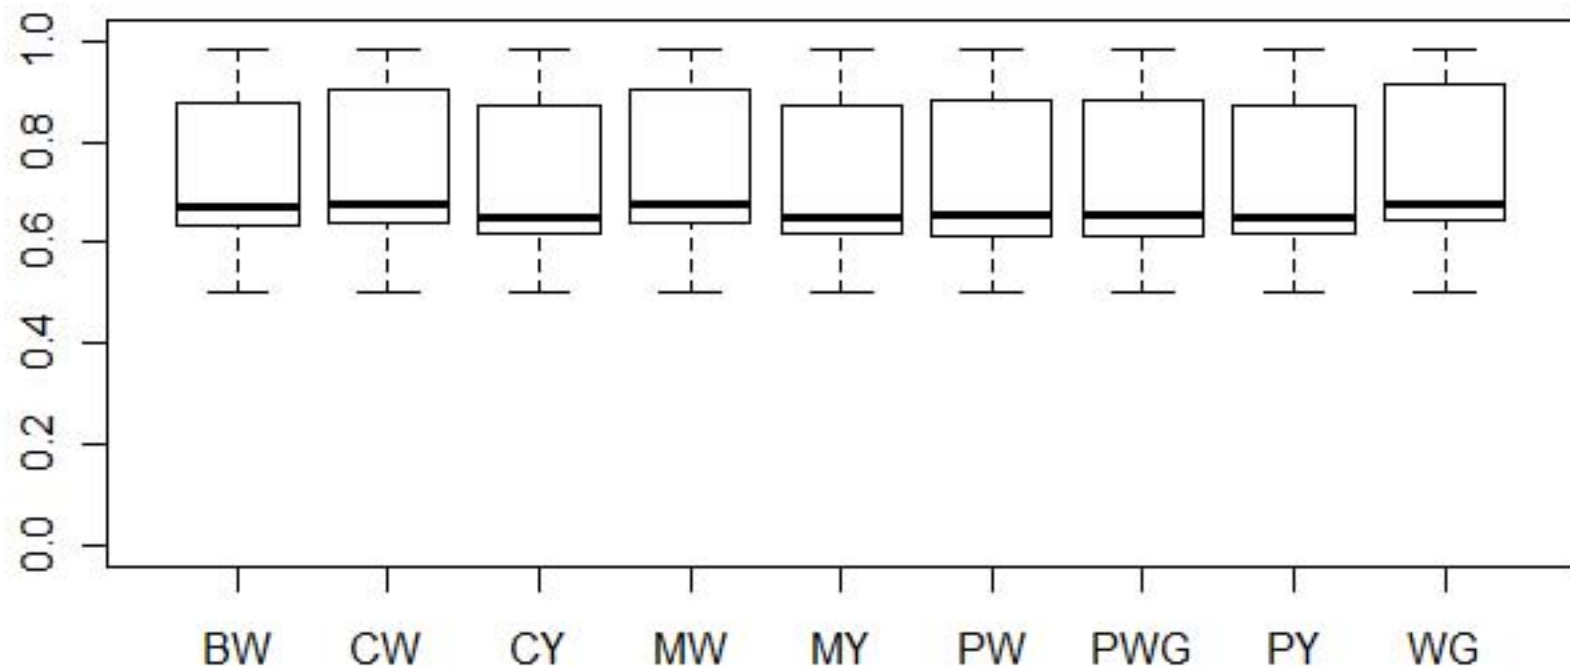

mRNA abundance (Tags per million)

50  
40  
30  
20  
10  
0

marbling fat  
semilendinosus  
longissimus  
longissimus dorsi  
biceps femoris  
skeletal muscle near caesarian opening  
infraspinatus  
cerebellum opening  
cerebellum  
tongue muscle  
kidney  
white fat  
ant. pituitary  
retina  
muscle/back  
thalamus  
placenta  
duodenum  
thyroid  
fetal tongue surface  
frontal cortex  
skin/back  
placenta above collydon  
ileum  
jejunum  
all pituitary  
diaphragm  
basal ganglia  
cerebral cortex  
hippocampus  
hypothalamus  
medulla  
midbrain  
outer tongue surface  
liver  
omasum  
small intestine/d7 hc  
adrenal  
pineal gland  
sme  
spinal cord  
temporal cortex  
fat pad of mammary  
bone  
bone marrow cells  
coronary band

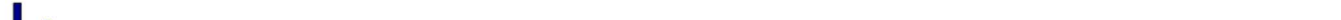

Relative RNA expression level

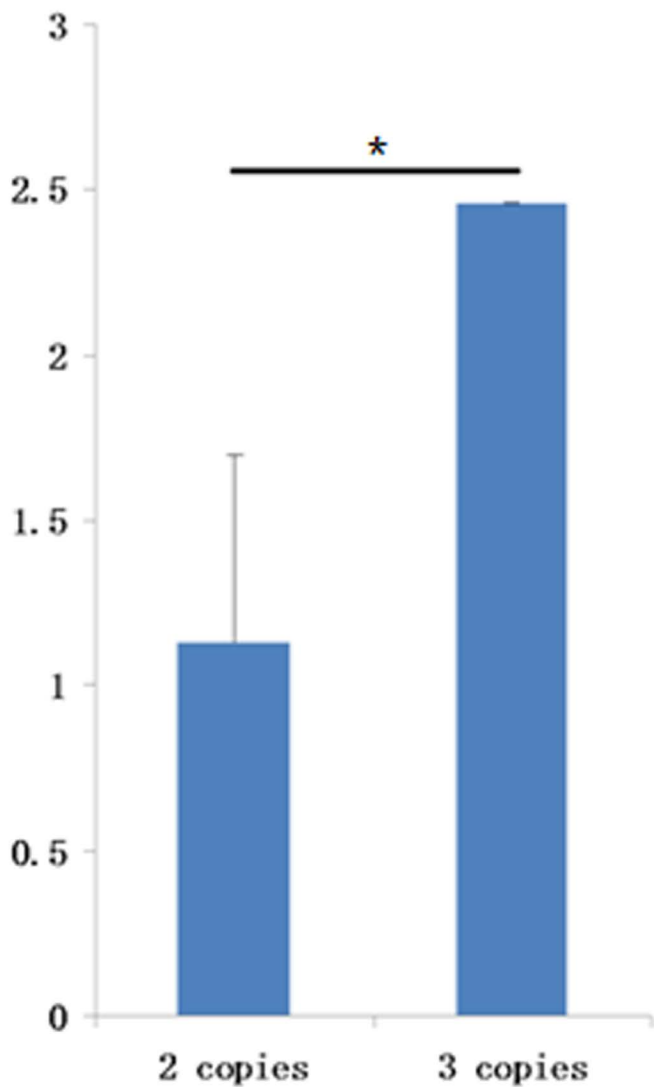

Supplement: 12864_2016_2461_MOESM2_ESM.pdf [file 12864_2016_2461_MOESM2_ESM.pdf]
